# Supplementary material for: Association Between Maternal Exposure to Lead, Maternal Folate Status, and Intergenerational Risk of Childhood Overweight and Obesity
Source: PubMed Central journal article supplement (PMC6777254; doi:10.1001/jamanetworkopen.2019.12343), 2019-10-02
Supplement: jamanetwopen-2-e1912343-s001.pdf [file jamanetwopen-2-e1912343-s001.pdf]

## Supplementary Online Content

Wang G, DiBari J, Bind E, et al. Association between maternal exposure to lead, maternal folate status, and intergenerational risk of childhood overweight and obesity. *JAMA Netw Open*. 2019;2(10):e1912343. doi:10.1001/jamanetworkopen.2019.12343

**eFigure 1.** Flowchart of the Sample Included in the Analysis

**eFigure 2.** Distribution of Maternal RBC Lead Levels in Total Sample and by Race/Ethnicity (Panel A) and Relationship Between Maternal RBC Lead and Child Blood Lead With 95% Confidence Interval (Panel B)

**eFigure 3.** Smooth Plots of Maternal RBC Lead and Child BMI z-Score and OWO Stratified by Gender

**eFigure 4.** Smooth Plots of Maternal RBC Lead and Child BMI z-Score and OWO Stratified by Child Blood Lead Levels

**eFigure 5.** Association Between Maternal RBC Lead and Child Blood Lead Levels and Child BMI z-Score and Proportion of OWO

**eFigure 6.** Maternal RBC Lead and Child Early Childhood Leptin z-Score (Panel A, n=822) and Child Early Childhood Insulin z-Score (Panel B, n=572); and Estimated Degree of Mediation by Leptin and Insulin on the Association Between Maternal RBC Lead and Child BMI z Score (Panel C)

**eTable 1.** Comparison of Prenatal and Early Childhood Characteristics Between Included and Excluded Samples

**eTable 2.** The Individual and Combined Associations of Maternal RBC-Lead Levels and Overweight or Obesity (OWO) Status on Child BMI z-Score and OWO Risk (Age Range: 2-15 Years), With Additional Adjustment for Child's Blood Lead in Early Childhood

**eTable 3.** The Individual and Combined Associations of Maternal Overweight or Obesity (OWO) Status and RBC Lead on Child BMI z-Score and OWO Risk (Age Range: 2-15 Years), With Additional Adjustment for Maternal Age

**eTable 4.** The Individual and Combined Associations of Maternal RBC-Lead Levels and Overweight or Obesity (OWO) Status on Child BMI z-Score and OWO Risk (Age Range: 2-15 Years), With Additional Adjustment for Cesarean Section

**eTable 5.** The Individual and Combined Associations of Maternal RBC-Lead Levels and Overweight or Obesity (OWO) Status on Child BMI z-Score and OWO Risk (Age Range: 2-15 Years), Among Term Births (n=1094)

**eTable 6.** The Individual and Combined Associations of Maternal RBC-Lead Levels and Overweight or Obesity (OWO) Status on Child BMI z-Score and OWO Risk (Age Range: 2-15 Years) Among Black Children (n=967)

**eTable 7.** The Individual and Combined Associations of Maternal RBC-Lead Levels and Overweight or Obesity (OWO) Status on Child BMI z-Scores and OWO Risk, Stratified by Child Age Groups: 2-5, 6-9, and 10-15 Years

**eTable 8.** The Individual and Combined Associations of Maternal RBC-Lead Levels and Overweight or Obesity (OWO) Status on Child BMI z-Score and OWO Risk (Age Range: 2-15 Years, n=704) Further Adjusted for Physical Activity

**eTable 9.** Propensity Score–Based Matched Analysis for Comparison of Low Lead (<2 µg/dL) vs. High Lead (≥5 µg/dL)

**eTable 10.** The Individual and Combined Associations of Maternal Overweight or Obesity (OWO) Status and Child Blood Lead Levels on Child BMI z-Score and OWO Risk (Age Range: 2-15 years, n=1271)

**eTable 11.** The Individual and Combined Associations of Maternal RBC Lead and Child Blood Lead Levels on Child BMI z-Score and Overweight or Obesity (OWO) Risk (Age Range: 2-15 Years, n=1271)

**eTable 12.** The Individual and Combined Associations of Maternal RBC Lead and Child Blood Lead Levels on Child Leptin and Insulin z-Scores

**eTable 13.** Maternal Plasma Folate Levels According to Prenatal Vitamin Intake During 3 Trimesters

**eTable 14.** Role of Maternal Folic Acid Intake During 2nd Trimester in the Associations of Maternal RBC-Lead Levels and Child BMI z-Score and Overweight or Obesity (OWO) Risk (Age Range: 2-15 Years), Stratified by Maternal OWO Status

**eTable 15.** Role of Maternal Folic Acid Intake During 3rd Trimester in the Associations of Maternal RBC-Lead Levels and Child BMI z-Score and Overweight or Obesity (OWO) Risk (Age Range: 2-15 Years), Stratified by Maternal OWO Status

This supplementary material has been provided by the authors to give readers additional information about their work.

**eFigure 1.** Flowchart of the sample included in the analysis

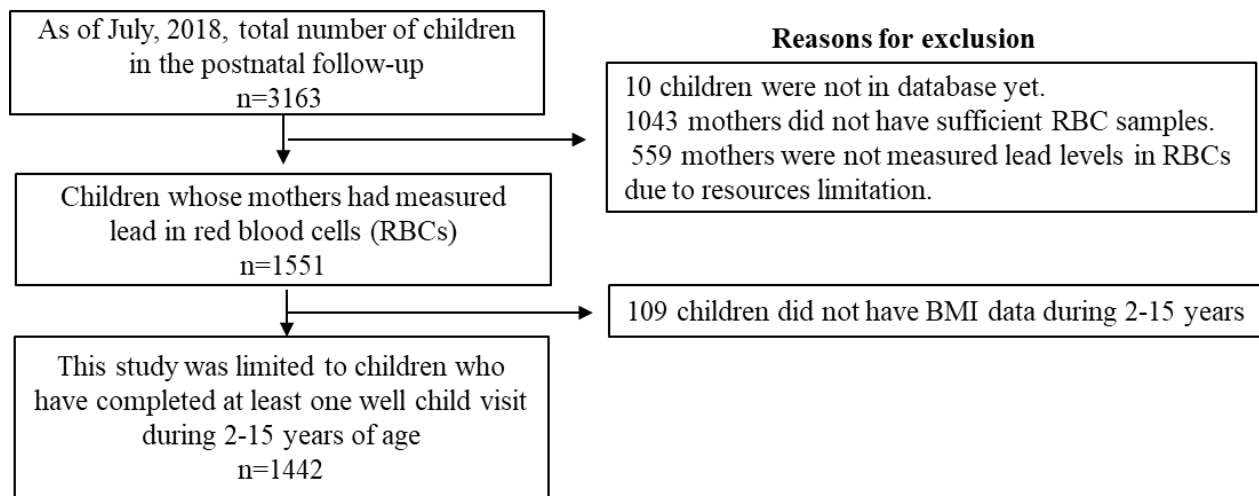

**eFigure 2.** Distribution of maternal RBC lead levels in total sample and by race/ethnicity (Panel A); and relationship between maternal RBC lead and child blood lead with 95% confidence interval (Panel B).

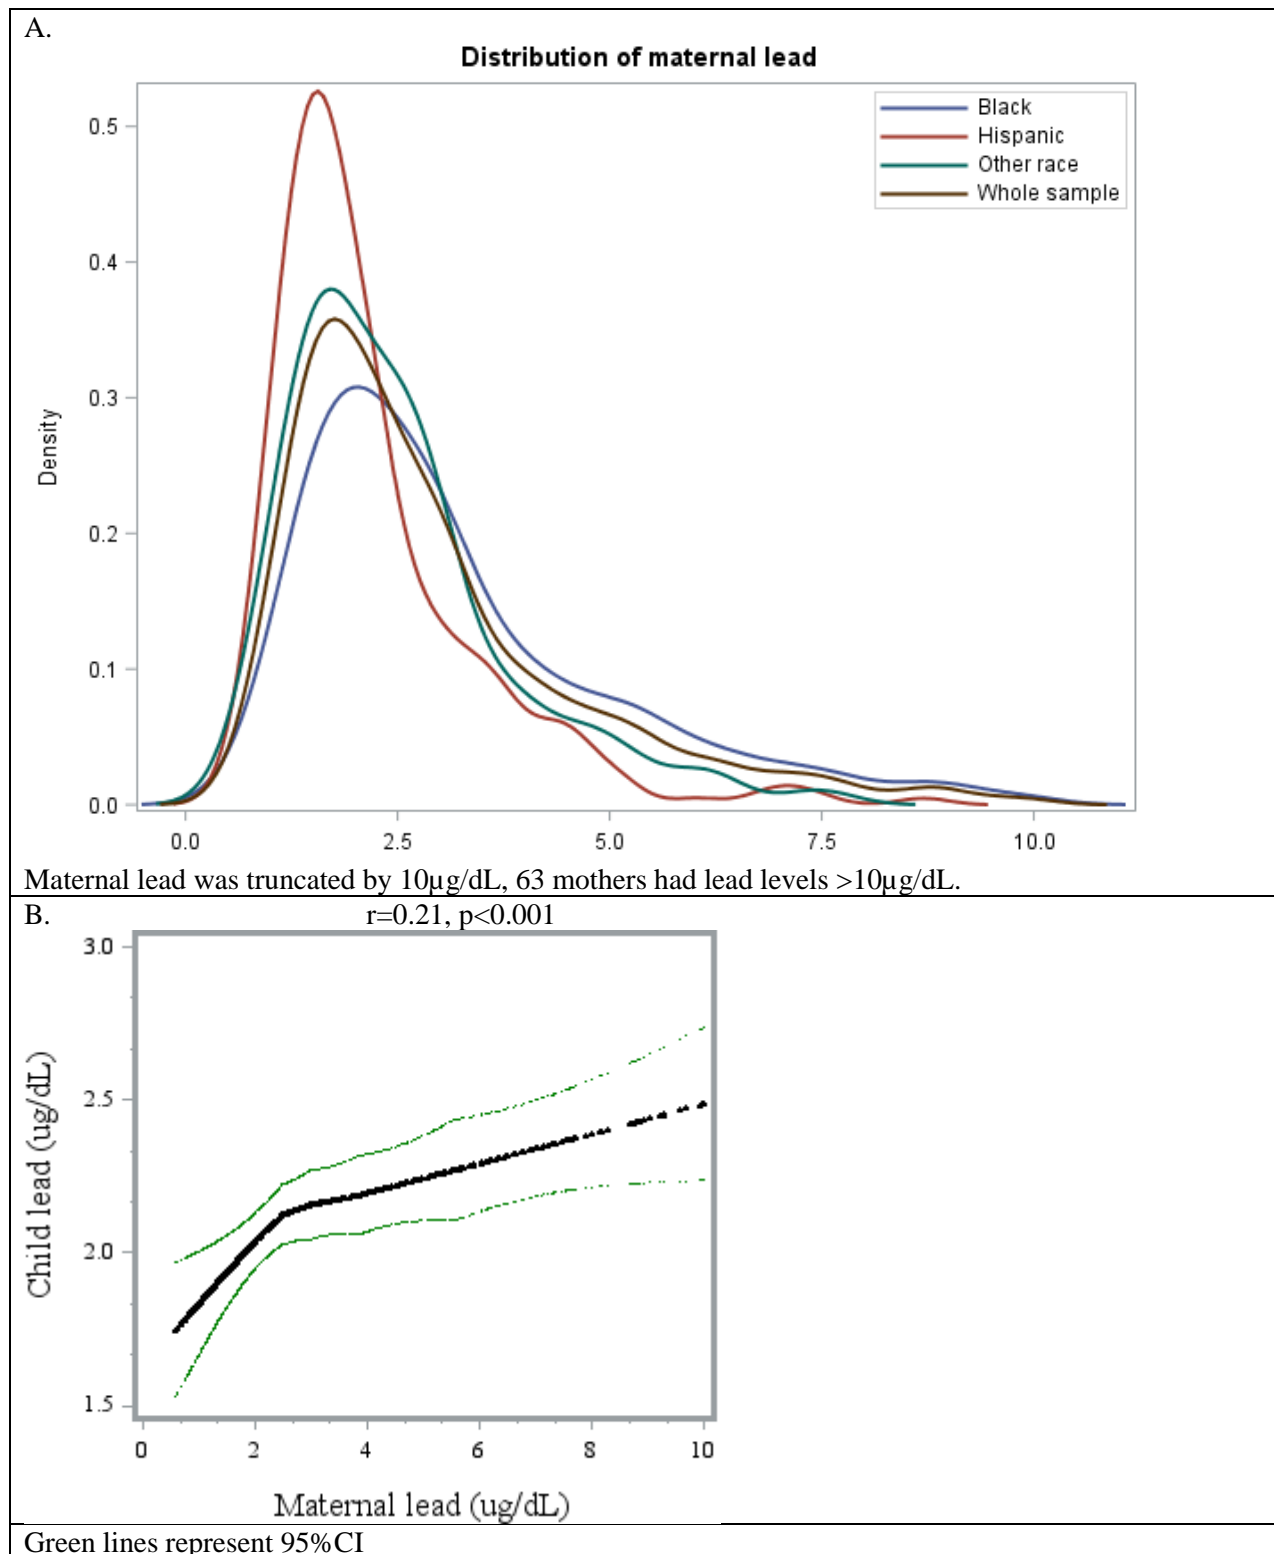

**eFigure 3.** Smooth plots of maternal RBC lead and child BMI z-score and OWO stratified by gender.

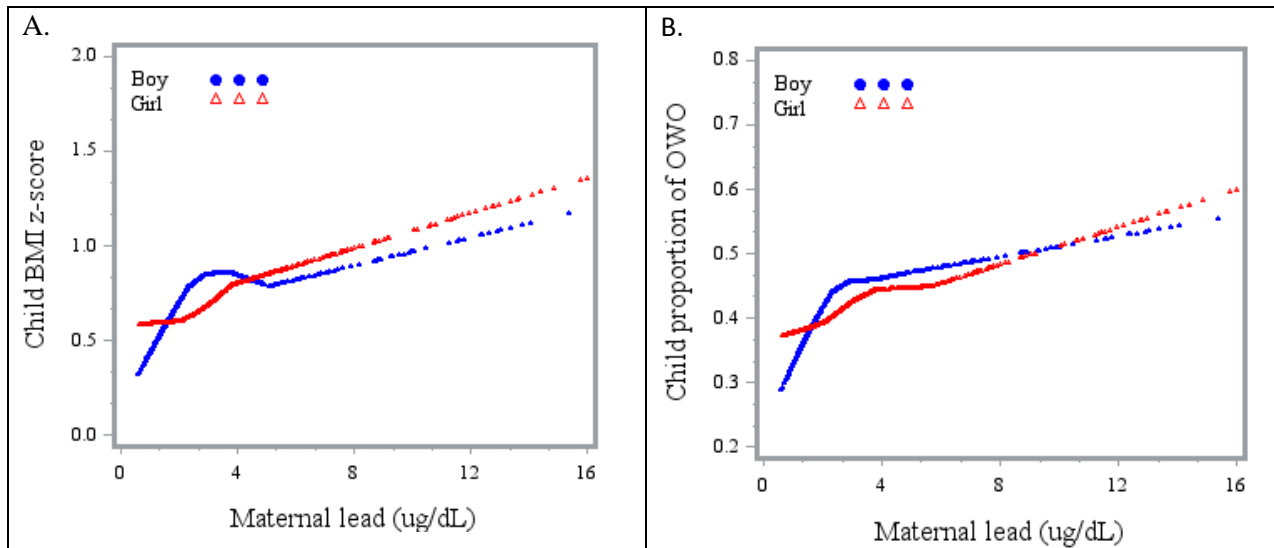

**eFigure 4.** Smooth plots of maternal RBC lead and child BMI z-score and OWO stratified by child blood lead levels.

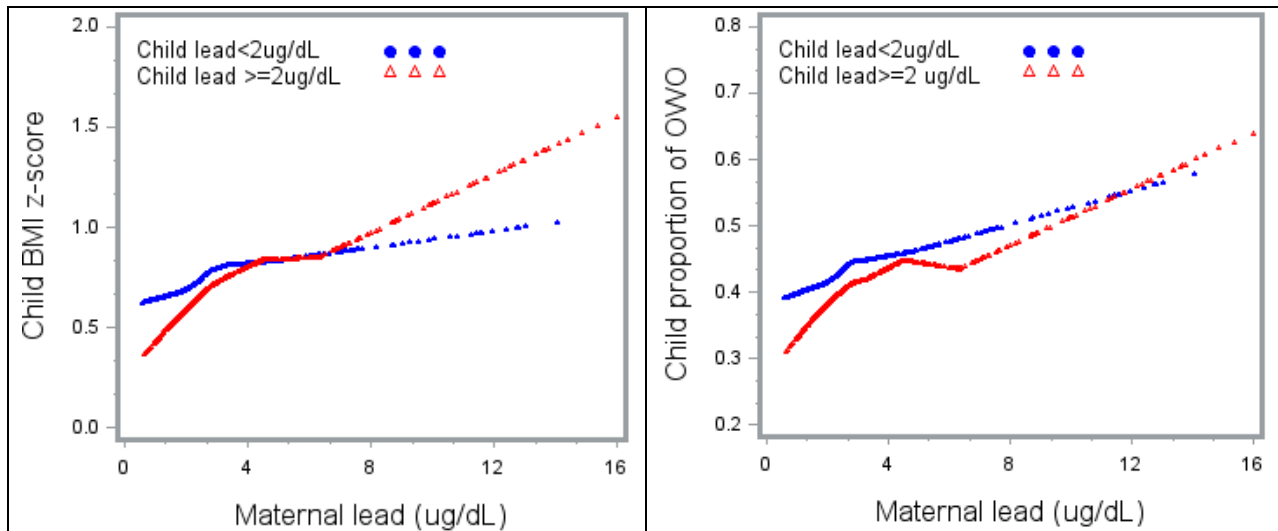

**eFigure 5.** Association between maternal RBC lead and child blood lead levels and child BMI z-score and proportion of OWO.

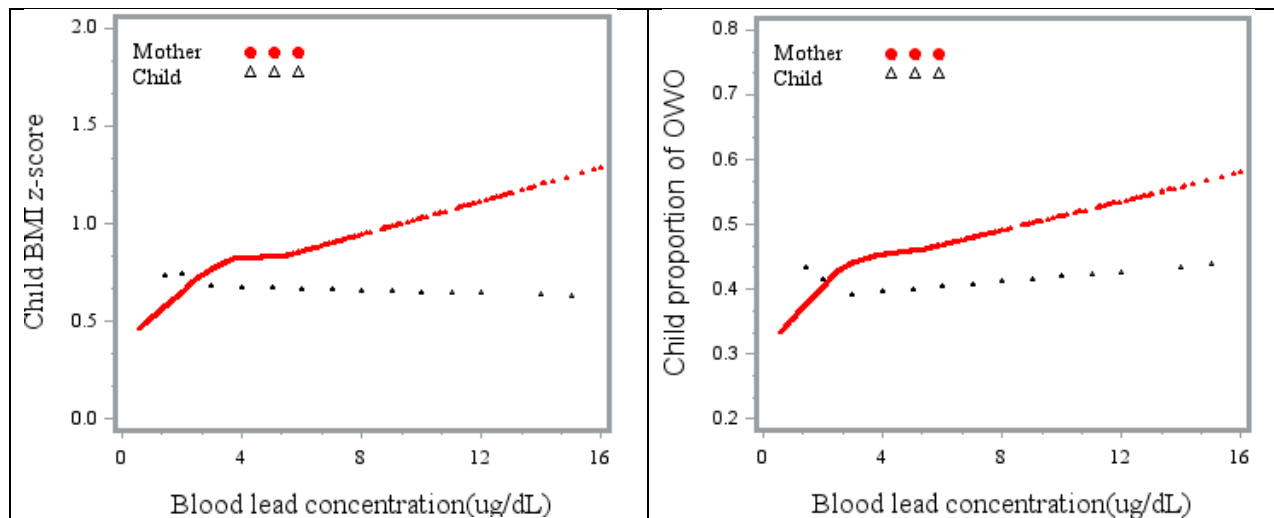

**eFigure 6.** Maternal RBC lead and child early childhood leptin z-score (Panel A, n=822); and child early childhood insulin z-score (Panel B, n=572); and estimated degree of mediation by leptin and insulin on the association between maternal RBC lead and child BMI z-score (Panel C).

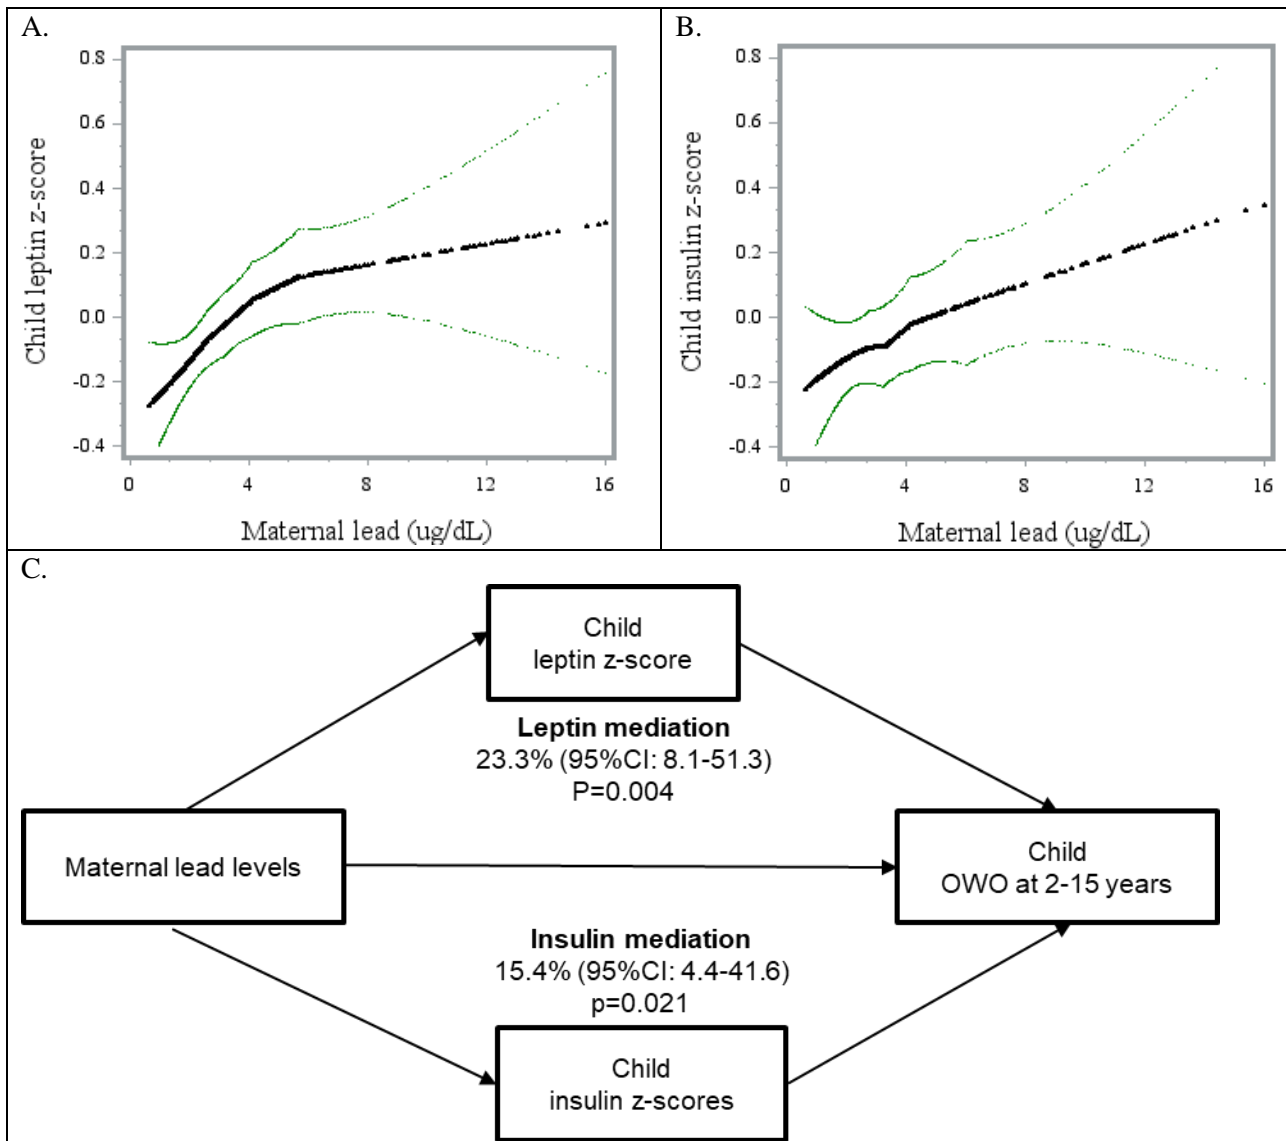

**eTable 1.** Comparison of the prenatal and early childhood characteristics between included and excluded samples

|                                  | Participants included in the study | Participants excluded in the study | P value |
|----------------------------------|------------------------------------|------------------------------------|---------|
| No.                              | 1442                               | 1711                               |         |
| Maternal age (years)             | 28.6±6.5                           | 28.5±6.5                           | 0.741   |
| Education                        |                                    |                                    | 0.692   |
| High school and below            | 936(64.9)                          | 1099(64.2)                         |         |
| College or above                 | 506(35.1)                          | 612(35.8)                          |         |
| Race/ethnicity                   |                                    |                                    | 0.002   |
| Black                            | 967(67.1)                          | 1044(61.0)                         |         |
| Hispanic                         | 291(20.2)                          | 411(24.0)                          |         |
| Other                            | 184(12.8)                          | 256(15.0)                          |         |
| Parity                           |                                    |                                    | 0.363   |
| Nulliparous                      | 603(41.8)                          | 743(43.4)                          |         |
| Multiparous                      | 839(58.2)                          | 968(56.6)                          |         |
| Smoking                          |                                    |                                    | 0.017   |
| Never                            | 1192(82.7)                         | 1381(80.7)                         |         |
| Quitter                          | 119(8.2)                           | 123(7.2)                           |         |
| Continuous                       | 131(9.1)                           | 207(12.1)                          |         |
| Prepregnancy BMI categories      |                                    |                                    | 0.160   |
| Lean                             | 681(47.2)                          | 851(49.7)                          |         |
| OWO                              | 761(52.8)                          | 860(50.3)                          |         |
| Diabetes status                  |                                    |                                    | 0.476   |
| Non-diabetes                     | 1258(87.2)                         | 1507(88.1)                         |         |
| Gestational/preexisting diabetes | 184(12.8)                          | 204(11.9)                          |         |
| Hypertensive disorder            |                                    |                                    | 0.659   |
| No                               | 1226(85.0)                         | 1445(84.5)                         |         |
| Yes                              | 216(15.0)                          | 266(15.5)                          |         |
| Mode of delivery                 |                                    |                                    | 0.653   |
| Vaginal                          | 921(63.9)                          | 1106(64.6)                         |         |
| Cesarean section                 | 521(36.1)                          | 605(35.4)                          |         |
| Child's gender                   |                                    |                                    | 0.736   |
| Boy                              | 722(50.1)                          | 867(50.7)                          |         |
| Girl                             | 720(49.9)                          | 844(49.3)                          |         |



**eTable 2.** The individual and combined associations of maternal RBC-lead levels and overweight or obesity (OWO) status on child BMI z-score and OWO risk (age range: 2-15 years), with additional adjustment for child’s blood lead in early childhood.

| Maternal status    |              | n   | Child BMI z-score |      |      |        | Child OWO   |      |           |        |
|--------------------|--------------|-----|-------------------|------|------|--------|-------------|------|-----------|--------|
| BMI                | Lead (µg/dL) |     | mean±SD           | β    | se   | p      | Case, n (%) | OR   | 95%CI     | p      |
|                    | <2           | 513 | 0.57±1.25         | ref  |      |        | 191(37.2)   | 1.00 |           |        |
|                    | 2-4          | 700 | 0.78±1.20         | 0.19 | 0.07 | 0.007  | 311(44.4)   | 1.36 | 1.06-1.73 | 0.015  |
|                    | ≥5           | 229 | 0.92±1.16         | 0.34 | 0.10 | <0.001 | 110(48.0)   | 1.68 | 1.19-2.36 | 0.003  |
| P for linear trend |              |     |                   |      |      | <0.001 |             |      |           | 0.009  |
| Combined           |              |     |                   |      |      |        |             |      |           |        |
| Non-OWO            | <2           | 261 | 0.22±1.17         | ref  |      |        | 65(24.9)    | 1.00 |           |        |
|                    | 2-4          | 320 | 0.51±1.24         | 0.31 | 0.10 | 0.001  | 113(35.3)   | 1.72 | 1.19-2.50 | 0.004  |
|                    | ≥5           | 100 | 0.54±1.17         | 0.34 | 0.14 | 0.013  | 35(35.0)    | 1.81 | 1.08-3.03 | 0.025  |
| OWO                | <2           | 252 | 0.95±1.23         | 0.65 | 0.10 | <0.001 | 126(50.0)   | 2.76 | 1.87-4.06 | <0.001 |
|                    | 2-4          | 380 | 1.00±1.12         | 0.71 | 0.10 | <0.001 | 198(52.1)   | 3.08 | 2.13-4.44 | <0.001 |
|                    | ≥5           | 129 | 1.21±1.07         | 0.93 | 0.13 | <0.001 | 75(58.1)    | 4.27 | 2.65-6.89 | <0.001 |

Abbreviation: BMI, body mass index; OWO, overweight or obesity.

Analyses were performed by linear and logistic regression models for outcome BMI z-scores and OWO, respectively. Adjusted for maternal education, parity, smoking, race, diabetes, hypertensive disorders, preterm, fetal growth, breastfeeding, and child early childhood blood lead.

**eTable 3.** The individual and combined associations of maternal RBC-lead levels and overweight or obesity (OWO) status on child BMI z-score and OWO risk (age range: 2-15 years), with additional adjustment for maternal age.

| Maternal status    |              | n   | Child BMI z-score |      |      |        | Child OWO   |      |           |        |
|--------------------|--------------|-----|-------------------|------|------|--------|-------------|------|-----------|--------|
| BMI                | Lead (µg/dL) |     | mean±SD           | β    | se   | p      | Case, n (%) | OR   | 95%CI     | p      |
|                    | <2           | 513 | 0.57±1.25         | ref  |      |        | 191(37.2)   | 1.00 |           |        |
|                    | 2-4          | 700 | 0.78±1.20         | 0.16 | 0.07 | 0.022  | 311(44.4)   | 1.30 | 1.01-1.68 | 0.041  |
|                    | ≥5           | 229 | 0.92±1.16         | 0.29 | 0.10 | 0.004  | 110(48.0)   | 1.58 | 1.10-2.25 | 0.012  |
| P for linear trend |              |     |                   |      |      | 0.003  |             |      |           | 0.038  |
| Combined           |              |     |                   |      |      |        |             |      |           |        |
| Non-OWO            |              |     |                   |      |      |        |             |      |           |        |
|                    | <2           | 261 | 0.22±1.17         | ref  |      |        | 65(24.9)    | 1.00 |           |        |
|                    | 2-4          | 320 | 0.51±1.24         | 0.30 | 0.10 | 0.002  | 113(35.3)   | 1.70 | 1.17-2.48 | 0.006  |
|                    | ≥5           | 100 | 0.54±1.17         | 0.31 | 0.14 | 0.025  | 35(35.0)    | 1.72 | 1.02-2.91 | 0.044  |
| OWO                |              |     |                   |      |      |        |             |      |           |        |
|                    | <2           | 252 | 0.95±1.23         | 0.63 | 0.10 | <0.001 | 126(50.0)   | 2.69 | 1.83-3.97 | <0.001 |
|                    | 2-4          | 380 | 1.00±1.12         | 0.67 | 0.10 | <0.001 | 198(52.1)   | 2.88 | 1.98-4.19 | <0.001 |
|                    | ≥5           | 129 | 1.21±1.07         | 0.89 | 0.13 | <0.001 | 75(58.1)    | 4.02 | 2.46-6.58 | <0.001 |

Abbreviation: BMI, body mass index; OWO, overweight or obesity.

Analyses were performed by linear and logistic regression models for outcome BMI z-scores and OWO, respectively.

Adjusted for maternal education, parity, smoking, race, diabetes, hypertensive disorders, preterm, fetal growth, breastfeeding, and maternal age.

**eTable 4.** The individual and combined associations of maternal RBC-lead levels and overweight or obesity (OWO) status on child BMI z-score and OWO risk (age range: 2-15 years), with additional adjustment for Cesarean section.

| Maternal status    |              | n   | Child BMI z-score |      |      |        | Child OWO   |      |           |        |
|--------------------|--------------|-----|-------------------|------|------|--------|-------------|------|-----------|--------|
| BMI                | Lead (µg/dL) |     | mean±SD           | β    | se   | p      | Case, n (%) | OR   | 95%CI     | p      |
|                    | <2           | 513 | 0.57±1.25         | ref  |      |        | 191(37.2)   | 1.00 |           |        |
|                    | 2-4          | 700 | 0.78±1.20         | 0.19 | 0.07 | 0.006  | 311(44.4)   | 1.36 | 1.06-1.75 | 0.014  |
|                    | ≥5           | 229 | 0.92±1.16         | 0.34 | 0.10 | <0.001 | 110(48.0)   | 1.70 | 1.20-2.40 | 0.003  |
| P for linear trend |              |     |                   |      |      | <0.001 |             |      |           | 0.007  |
| Combined           |              |     |                   |      |      |        |             |      |           |        |
| Non-OWO            |              |     |                   |      |      |        |             |      |           |        |
|                    | <2           | 261 | 0.22±1.17         | ref  |      |        | 65(24.9)    | 1.00 |           |        |
|                    | 2-4          | 320 | 0.51±1.24         | 0.31 | 0.10 | 0.001  | 113(35.3)   | 1.75 | 1.20-2.54 | 0.004  |
|                    | ≥5           | 100 | 0.54±1.17         | 0.34 | 0.14 | 0.014  | 35(35.0)    | 1.80 | 1.07-3.03 | 0.030  |
| OWO                |              |     |                   |      |      |        |             |      |           |        |
|                    | <2           | 252 | 0.95±1.23         | 0.64 | 0.10 | <0.001 | 126(50.0)   | 2.70 | 1.83-3.98 | <0.001 |
|                    | 2-4          | 380 | 1.00±1.12         | 0.70 | 0.10 | <0.001 | 198(52.1)   | 3.00 | 2.08-4.34 | <0.001 |
|                    | ≥5           | 129 | 1.21±1.07         | 0.93 | 0.13 | <0.001 | 75(58.1)    | 4.28 | 2.65-6.92 | <0.001 |

Abbreviation: BMI, body mass index; OWO, overweight or obesity.

Analyses were performed by linear and logistic regression models for outcome BMI z-scores and OWO, respectively.

Adjusted for maternal education, parity, smoking, race, diabetes, hypertensive disorders, preterm, fetal growth, breastfeeding, and cesarean section.

**eTable 5.** The individual and combined associations of maternal RBC-lead levels and overweight or obesity (OWO) status on child BMI z-score and OWO risk (age range: 2-15 years) among term births (n=1094).

| Maternal status    |              |     | Child BMI z-score |      |      |        | Child OWO   |      |           |        |
|--------------------|--------------|-----|-------------------|------|------|--------|-------------|------|-----------|--------|
| BMI                | Lead (µg/dL) | n   | mean±SD           | β    | Se   | p      | Case, n (%) | OR   | 95%CI     | p      |
|                    | <2           | 372 | 0.57±1.21         | ref  |      |        | 136(36.6)   | 1.00 |           |        |
|                    | 2-4          | 538 | 0.76±1.15         | 0.14 | 0.08 | 0.078  | 238(44.2)   | 1.29 | 0.97-1.72 | 0.082  |
|                    | ≥5           | 184 | 0.99±1.16         | 0.35 | 0.11 | 0.002  | 93(50.5)    | 1.76 | 1.18-2.61 | 0.005  |
| P for linear trend |              |     |                   |      |      | 0.001  |             |      |           | 0.018  |
| Combined           |              |     |                   |      |      |        |             |      |           |        |
| Non-OWO            | <2           | 200 | 0.22±1.18         | ref  |      |        | 50(25.0)    | 1.00 |           |        |
|                    | 2-4          | 247 | 0.48±1.18         | 0.24 | 0.11 | 0.025  | 83(33.6)    | 1.49 | 0.97-2.28 | 0.068  |
|                    | ≥5           | 79  | 0.64±1.18         | 0.36 | 0.15 | 0.019  | 30(38.0)    | 1.87 | 1.04-3.36 | 0.036  |
| OWO                | <2           | 172 | 0.97±1.12         | 0.63 | 0.12 | <0.001 | 86(50.0)    | 2.60 | 1.65-4.10 | <0.001 |
|                    | 2-4          | 291 | 1.00±1.08         | 0.63 | 0.11 | <0.001 | 155(53.3)   | 2.87 | 1.89-4.38 | <0.001 |
|                    | ≥5           | 105 | 1.25±1.07         | 0.89 | 0.14 | <0.001 | 63(60.0)    | 4.08 | 2.37-7.01 | <0.001 |

Abbreviation: BMI, body mass index; OWO, overweight or obesity.

Analyses were performed by linear and logistic regression models for outcome BMI z-scores and OWO, respectively. Adjusted for maternal education, parity, smoking, race, diabetes, hypertensive disorders, preterm, fetal growth, breastfeeding.

**eTable 6.** The individual and combined associations of maternal RBC-lead levels and overweight or obesity (OWO) status on child BMI z-score and OWO risk (age range: 2-15 years) among Black children (n=967).

| Maternal status    |              | n   | Child BMI z-score |      |      |        | Child OWO   |      |           |        |
|--------------------|--------------|-----|-------------------|------|------|--------|-------------|------|-----------|--------|
| BMI                | Lead (µg/dL) |     | mean±SD           | β    | Se   | p      | Case, n (%) | OR   | 95%CI     | p      |
|                    | <2           | 269 | 0.52±1.26         | ref  |      |        | 97(36.1)    | 1.00 |           |        |
|                    | 2-4          | 496 | 0.76±1.17         | 0.22 | 0.09 | 0.014  | 216(43.6)   | 1.31 | 0.95-1.80 | 0.095  |
|                    | ≥5           | 202 | 0.98±1.16         | 0.44 | 0.11 | <0.001 | 99(49.0)    | 1.74 | 1.17-2.58 | 0.006  |
| P for linear trend |              |     |                   |      |      | <0.001 |             |      |           | 0.019  |
| Combined           |              |     |                   |      |      |        |             |      |           |        |
| Non-OWO            |              |     |                   |      |      |        |             |      |           |        |
|                    | <2           | 131 | 0.12±1.20         | ref  |      |        | 30(22.9)    | 1.00 |           |        |
|                    | 2-4          | 210 | 0.48±1.19         | 0.36 | 0.13 | 0.005  | 68(32.4)    | 1.57 | 0.95-2.61 | 0.079  |
|                    | ≥5           | 86  | 0.62±1.16         | 0.49 | 0.16 | 0.002  | 32(37.2)    | 2.09 | 1.13-3.86 | 0.019  |
| OWO                |              |     |                   |      |      |        |             |      |           |        |
|                    | <2           | 138 | 0.90±1.21         | 0.72 | 0.14 | <0.001 | 67(48.6)    | 2.96 | 1.72-5.10 | <0.001 |
|                    | 2-4          | 286 | 0.97±1.12         | 0.77 | 0.12 | <0.001 | 148(51.8)   | 3.26 | 2.01-5.30 | <0.001 |
|                    | ≥5           | 116 | 1.25±1.09         | 1.04 | 0.15 | <0.001 | 67(57.8)    | 4.34 | 2.45-7.67 | <0.001 |

Abbreviation: BMI, body mass index; OWO, overweight or obesity.

Analyses were performed by linear and logistic regression models for outcome BMI z-scores and OWO, respectively.

Adjusted for maternal education, parity, smoking, race, diabetes, hypertensive disorders, preterm, fetal growth, breastfeeding.

**eTable 7.** The individual and combined associations of maternal RBC-lead levels and overweight or obesity (OWO) status on child BMI z-scores and OWO risk, stratified by child age groups: 2-5, 6-9, and 10-15 years.

| Maternal status                |              | n   | Child BMI z-score |       |      |        | Child OWO   |      |           |        |
|--------------------------------|--------------|-----|-------------------|-------|------|--------|-------------|------|-----------|--------|
| BMI                            | Lead (ug/dl) |     | mean±SD           | β     | Se   | p      | Case, n (%) | OR   | 95%CI     | p      |
| <b>Age 2-5 years (n=1395)</b>  |              |     |                   |       |      |        |             |      |           |        |
| Linear                         | <2           | 495 | 0.44±1.38         | ref   |      |        | 163(32.9)   | 1.00 |           |        |
|                                | 2-4          | 677 | 0.67±1.28         | 0.22  | 0.08 | 0.004  | 277(40.9)   | 1.42 | 1.10-1.83 | 0.008  |
|                                | ≥5           | 223 | 0.83±1.26         | 0.38  | 0.11 | <0.001 | 109(48.9)   | 2.02 | 1.42-2.87 | <0.001 |
|                                | P trend      |     |                   |       |      | <0.001 |             |      |           | <0.001 |
| <b>Combined</b>                |              |     |                   |       |      |        |             |      |           |        |
| Non-OWO                        | <2           | 252 | 0.04±1.26         | ref   |      |        | 53(21.0)    | 1.00 |           |        |
|                                | 2-4          | 313 | 0.45±1.30         | 0.45  | 0.11 | <0.001 | 111(35.5)   | 2.18 | 1.47-3.23 | <0.001 |
|                                | ≥5           | 99  | 0.49±1.26         | 0.47  | 0.15 | 0.002  | 37(37.4)    | 2.36 | 1.39-4.01 | 0.002  |
| OWO                            | <2           | 243 | 0.86±1.38         | 0.75  | 0.11 | <0.001 | 110(45.3)   | 2.91 | 1.93-4.39 | <0.001 |
|                                | 2-4          | 364 | 0.85±1.24         | 0.75  | 0.11 | <0.001 | 166 (45.6)  | 2.94 | 1.99-4.34 | <0.001 |
|                                | ≥5           | 124 | 1.09±1.21         | 1.00  | 0.14 | <0.001 | 72(58.1)    | 5.14 | 3.12-8.46 | <0.001 |
| <b>Age 6-9 years (n=1030)</b>  |              |     |                   |       |      |        |             |      |           |        |
| linear                         | <2           | 349 | 0.69±1.23         | ref   |      |        | 152(43.6)   | 1.00 |           |        |
|                                | 2-4          | 508 | 0.85±1.16         | 0.15  | 0.08 | 0.067  | 238(46.9)   | 1.16 | 0.87-1.56 | 0.312  |
|                                | ≥5           | 173 | 0.96±1.15         | 0.26  | 0.11 | 0.023  | 86(49.7)    | 1.37 | 0.92-2.04 | 0.124  |
|                                | P trend      |     |                   |       |      | 0.014  |             |      |           | 0.256  |
| <b>Combined</b>                |              |     |                   |       |      |        |             |      |           |        |
| Non-OWO                        | <2           | 171 | 0.34±1.17         | ref   |      |        | 51(29.8)    | 1.00 |           |        |
|                                | 2-4          | 218 | 0.53±1.16         | 0.20  | 0.12 | 0.085  | 81(37.2)    | 1.46 | 0.94-2.26 | 0.095  |
|                                | ≥5           | 74  | 0.58±1.20         | 0.22  | 0.16 | 0.146  | 27(36.5)    | 1.46 | 0.80-2.66 | 0.215  |
| OWO                            | <2           | 178 | 1.02±1.21         | 0.56  | 0.12 | <0.001 | 101(56.7)   | 2.64 | 1.67-4.18 | <0.001 |
|                                | 2-4          | 290 | 1.09±1.11         | 0.64  | 0.11 | <0.001 | 157 (54.1)  | 2.50 | 1.63-3.83 | <0.001 |
|                                | ≥5           | 99  | 1.25±1.04         | 0.81  | 0.15 | <0.001 | 59(59.6)    | 3.35 | 1.92-5.83 | <0.001 |
| <b>Age 10-15 years (n=449)</b> |              |     |                   |       |      |        |             |      |           |        |
| linear                         | <2           | 122 | 0.75±1.18         | ref   |      |        | 49(40.2)    | 1.00 |           |        |
|                                | 2-4          | 232 | 0.88±1.18         | 0.08  | 0.13 | 0.529  | 112(48.3)   | 1.27 | 0.79-2.06 | 0.322  |
|                                | ≥5           | 95  | 1.09±0.98         | 0.35  | 0.16 | 0.029  | 53(55.8)    | 2.04 | 1.12-3.72 | 0.021  |
|                                | P trend      |     |                   |       |      | 0.028  |             |      |           | 0.039  |
| <b>Combined</b>                |              |     |                   |       |      |        |             |      |           |        |
| Non-OWO                        | <2           | 58  | 0.46±1.02         | ref   |      |        | 17(29.3)    | 1.00 |           |        |
|                                | 2-4          | 100 | 0.43±1.23         | -0.04 | 0.18 | 0.825  | 33(33.0)    | 1.14 | 0.54-2.38 | 0.733  |
|                                | ≥5           | 37  | 0.78±1.01         | 0.37  | 0.23 | 0.112  | 16(43.2)    | 2.14 | 0.85-5.37 | 0.105  |
| OWO                            | <2           | 64  | 1.00±1.26         | 0.46  | 0.20 | 0.020  | 32(50.0)    | 2.17 | 0.98-4.82 | 0.057  |
|                                | 2-4          | 132 | 1.22±1.02         | 0.63  | 0.18 | <0.001 | 79 (59.8)   | 3.03 | 1.48-6.21 | 0.003  |
|                                | ≥5           | 58  | 1.28±0.92         | 0.77  | 0.21 | <0.001 | 37(63.8)    | 4.20 | 1.80-9.79 | <0.001 |

Abbreviation: BMI, body mass index; OWO, overweight or obesity.

Analyses were performed by linear and logistic regression models for outcome BMI z-scores and OWO, respectively.

Adjusted for maternal education, parity, smoking, race, diabetes, hypertensive disorders, preterm, fetal growth, breastfeeding.

**eTable 8.** The individual and combined associations of maternal RBC-lead levels and overweight or obesity (OWO) status on child BMI z-score and OWO risk (age range: 2-15 years, n=704) further adjusted for physical activity.

| Maternal status    |              | n   | Offspring BMI z-score |      |      |        | Offspring OWO |      |           |        |
|--------------------|--------------|-----|-----------------------|------|------|--------|---------------|------|-----------|--------|
| BMI                | Lead (µg/dL) |     | mean±SD               | β    | se   | P      | Case, n (%)   | OR   | 95%CI     | p      |
| non-OWO            |              | 318 | 0.41±1.21             | ref  |      |        | 101(31.8)     | ref  |           |        |
| OWO                |              | 386 | 1.09±1.16             | 0.57 | 0.09 | <0.001 | 213 (55.2)    | 2.35 | 1.69-3.28 | <0.001 |
|                    | <2           | 234 | 0.68±1.30             | ref  |      |        | 94(40.2)      | 1.00 |           |        |
|                    | 2-4          | 357 | 0.80±1.20             | 0.09 | 0.10 | 0.372  | 161(45.1)     | 1.21 | 0.85-1.72 | 0.298  |
|                    | ≥5           | 113 | 0.97±1.16             | 0.27 | 0.14 | 0.058  | 59(52.2)      | 1.64 | 1.01-2.68 | 0.046  |
| P for linear trend |              |     |                       |      |      | 0.066  |               |      |           | 0.050  |
| <b>Combined</b>    |              |     |                       |      |      |        |               |      |           |        |
| non-OWO            | <2           | 110 | 0.27±1.22             | ref  |      |        | 32(29.1)      | 1.00 |           |        |
|                    | 2-4          | 157 | 0.44±1.22             | 0.18 | 0.15 | 0.205  | 50(31.9)      | 1.16 | 0.67-2.00 | 0.599  |
|                    | ≥5           | 51  | 0.61±1.16             | 0.36 | 0.20 | 0.076  | 19(37.3)      | 1.56 | 0.75-3.24 | 0.263  |
| OWO                | <2           | 124 | 1.04±1.26             | 0.67 | 0.16 | <0.001 | 62(50.0)      | 2.17 | 1.23-3.83 | 0.008  |
|                    | 2-4          | 200 | 1.07±1.12             | 0.71 | 0.15 | <0.001 | 111(55.5)     | 2.84 | 1.66-4.86 | <0.001 |
|                    | ≥5           | 62  | 1.27±1.07             | 0.93 | 0.19 | <0.001 | 40(64.5)      | 4.28 | 2.10-8.71 | <0.001 |

Abbreviation: BMI, body mass index; OWO, overweight or obesity.

Analyses were performed by linear and logistic regression models for outcome BMI z-scores and OWO, respectively.

Adjusted for maternal education, parity, smoking, race/ethnicity, diabetes, hypertensive disorders, preterm, fetal growth, breastfeeding, and physical activity.

**eTable 9.** Propensity score–based matched analysis for comparison of low lead (<2µg/dL) vs. high lead (≥5µg/dL)

| Variable                                   | Maternal low lead<br><2µg/dL | Maternal high lead<br>≥5µg/dL | SMD    | P value |
|--------------------------------------------|------------------------------|-------------------------------|--------|---------|
| N                                          | 204                          | 204                           |        |         |
| Maternal lead levels,<br>median(IQR),µg/dL | 1.54(1.34, 1.75)             | 7.24(5.68, 10.30)             |        | <0.001  |
| Odds ratio                                 | reference                    | 1.26(1.03-1.54)               |        | 0.022   |
| OWO rate (%)                               | 76(37.25)                    | 99(48.53)                     | 0.172  | 0.021   |
| Child BMI z-score                          | 0.61±1.23                    | 0.92±1.16                     | 0.205  | 0.009   |
| <b>Maternal characteristic</b>             |                              |                               |        |         |
| Race (%)                                   |                              |                               | 0.084  | 0.704   |
| Black                                      | 177(86.76)                   | 177(86.76)                    |        |         |
| Hispanic                                   | 9(4.41)                      | 12(5.88)                      |        |         |
| Other                                      | 18(8.82)                     | 15(7.35)                      |        |         |
| Education (%)                              |                              |                               | 0.000  | 0.760   |
| High school and below                      | 124(60.78)                   | 127(62.25)                    |        |         |
| College and above                          | 80(39.22)                    | 77(37.75)                     |        |         |
| Maternal smoking                           |                              |                               | 0.038  | 0.704   |
| Never                                      | 188(92.16)                   | 190(93.14)                    |        |         |
| Continuous                                 | 16(7.84)                     | 14(6.86)                      |        |         |
| Parity                                     |                              |                               | 0.080  | 0.425   |
| Nulliparous                                | 94(46.08)                    | 86(42.16)                     |        |         |
| Multiparous                                | 110(53.92)                   | 118(57.84)                    |        |         |
| BMI categories                             |                              |                               | 0.080  | 0.372   |
| Lean                                       | 100(49.02)                   | 91(44.61)                     |        |         |
| OWO                                        | 104(50.98)                   | 113(55.39)                    |        |         |
| Maternal diabetes (%)                      |                              |                               | -0.031 | 0.454   |
| No                                         | 181(88.73)                   | 176(86.27)                    |        |         |
| Yes                                        | 23(11.27)                    | 28(13.73)                     |        |         |
| Hypertensive disorder                      |                              |                               | -0.014 | 0.777   |
| No                                         | 174(85.29)                   | 176(86.27)                    |        |         |
| Yes                                        | 30(14.71)                    | 28(13.73)                     |        |         |
| Mode of delivery                           |                              |                               | 0.031  | 0.604   |
| Vaginal                                    | 135(66.18)                   | 130(63.73)                    |        |         |
| Cesarean section                           | 69(33.82)                    | 74(36.27)                     |        |         |
| <b>Child's characteristic</b>              |                              |                               |        |         |
| Child's age, mean±SD, years                | 8.30±3.05                    | 8.59±3.39                     | 0.033  | 0.373   |
| Gender (%)                                 |                              |                               | 0.040  | 0.843   |
| Boy                                        | 93(45.59)                    | 95(46.57)                     |        |         |
| Girl                                       | 111(54.41)                   | 109(53.43)                    |        |         |
| Preterm                                    | 39(19.12)                    | 42(20.59)                     | 0.037  | 0.710   |
| Fetal growth                               |                              |                               | 0.048  | 0.973   |
| Appropriate for gestational age            | 167(81.86)                   | 167(81.86)                    |        |         |
| Small for gestational age                  | 17(8.33)                     | 16(7.84)                      |        |         |
| Large for gestational age                  | 20(9.80)                     | 21(10.29)                     |        |         |
| Breastfeeding, n(%)                        |                              |                               | 0.102  | 0.803   |
| Formula                                    | 47(23.04)                    | 45(22.06)                     |        |         |
| Breastfeeding                              | 10(4.90)                     | 13(6.37)                      |        |         |
| Both                                       | 147(72.06)                   | 146(71.57)                    |        |         |

Abbreviation: BMI, body mass index (calculated as weight in kilograms divided by height in meters squared); OWO, overweight or obesity; SMD, Standardized Mean Difference.

**Analysis:** We applied a non-parimonious multivariable logistic regression model to calculate propensity scores for low lead (<2µg/dL) and high lead (≥5µg/dL), using the following covariates: maternal education, race, smoking status, parity, diabetes status, hypertensive disorder, child's age, gender, preterm, fetal growth, and breastfeeding.



**eTable 10.** The individual and combined associations of maternal overweight or obesity (OWO) status and child blood lead levels on child BMI z-score and OWO risk (age range: 2-15 years, n=1271).

| Maternal BMI      | Child Lead (µg/dl) | n   | Child BMI z-score |       |      |        | Child OWO   |      |           |        |
|-------------------|--------------------|-----|-------------------|-------|------|--------|-------------|------|-----------|--------|
|                   |                    |     | mean±SD           | β     | se   | p      | Case, n (%) | OR   | 95%CI     | P      |
|                   | <2                 | 679 | 0.74±1.23         | ref   |      |        | 295(43.5)   | 1.00 |           |        |
|                   | 2-4                | 526 | 0.72±1.18         | -0.01 | 0.07 | 0.831  | 214(40.7)   | 0.88 | 0.69-1.12 | 0.303  |
|                   | ≥5                 | 66  | 0.81±1.21         | 0.15  | 0.15 | 0.314  | 31(47.0)    | 1.26 | 0.74-2.15 | 0.397  |
|                   | P trend            |     |                   |       |      | 0.504  |             |      |           | 0.937  |
| <b>Stratified</b> |                    |     |                   |       |      |        |             |      |           |        |
| Non-OWO           | <2                 | 312 | 0.44±1.22         | ref   |      |        | 105(33.7)   | 1.00 |           |        |
|                   | 2-4                | 262 | 0.39±1.19         | -0.05 | 0.10 | 0.613  | 74(28.2)    | 0.74 | 0.51-1.07 | 0.107  |
|                   | ≥5                 | 26  | 0.44±1.12         | 0.17  | 0.25 | 0.504  | 10(38.5)    | 1.43 | 0.60-3.45 | 0.421  |
| OWO               | <2                 | 367 | 1.00±1.18         | ref   |      |        | 190(51.8)   | 1.00 |           |        |
|                   | 2-4                | 264 | 1.05±1.07         | 0.05  | 0.10 | 0.599  | 140(53.0)   | 1.04 | 0.74-1.46 | 0.810  |
|                   | ≥5                 | 40  | 1.05±1.22         | 0.11  | 0.19 | 0.554  | 21(52.5)    | 1.12 | 0.56-2.22 | 0.754  |
| <b>Combined</b>   |                    |     |                   |       |      |        |             |      |           |        |
| Non-OWO           | <2                 | 312 | 0.44±1.22         | ref   |      |        | 105(33.7)   | 1.00 |           |        |
|                   | 2-4                | 262 | 0.39±1.19         | -0.03 | 0.10 | 0.735  | 74(28.2)    | 0.77 | 0.53-1.11 | 0.157  |
|                   | ≥5                 | 26  | 0.44±1.12         | 0.16  | 0.24 | 0.504  | 10(38.5)    | 1.49 | 0.64-3.50 | 0.357  |
| OWO               | <2                 | 367 | 1.00±1.18         | 0.48  | 0.09 | <0.001 | 190(51.8)   | 1.93 | 1.40-2.67 | <0.001 |
|                   | 2-4                | 264 | 1.05±1.07         | 0.51  | 0.10 | <0.001 | 140(53.0)   | 1.96 | 1.38-2.79 | <0.001 |
|                   | ≥5                 | 40  | 1.05±1.22         | 0.56  | 0.19 | 0.004  | 21(52.5)    | 1.99 | 1.00-3.95 | 0.050  |

Abbreviation: BMI, body mass index; OWO, overweight or obesity.

Analyses were performed by linear and logistic regression models for outcome BMI z-scores and OWO, respectively.

Adjusted for maternal education, parity, smoking, race, diabetes, hypertensive disorders, preterm, fetal growth, breastfeeding, and maternal lead in red blood cells.

**eTable 11.** The individual and combined associations of maternal RBC lead and child blood lead levels on child BMI z-score and overweight or obesity (OWO) risk (age range: 2-15 years, n=1271).

| Maternal Lead (µg/dl)            | Child Lead (µg/dl) | n   | Child BMI z-score |       |      |       | Child OWO   |      |           |       |
|----------------------------------|--------------------|-----|-------------------|-------|------|-------|-------------|------|-----------|-------|
|                                  |                    |     | mean±SD           | B     | se   | p     | Case, n (%) | OR   | 95%CI     | P     |
|                                  | <2                 | 679 | 0.74±1.23         | Ref   |      |       | 295(43.5)   | 1.00 |           |       |
|                                  | ≥2                 | 592 | 0.73±1.18         | 0.05  | 0.07 | 0.483 | 245(41.4)   | 0.98 | 0.77-1.24 | 0.869 |
| <2                               | <2                 | 440 | 0.59±1.26         | Ref   |      |       | 165(37.5)   | 1.00 |           |       |
| <2                               | ≥2                 | 831 | 0.82±1.17         | 0.20  | 0.07 | 0.004 | 375(45.1)   | 1.37 | 1.06-1.76 | 0.017 |
| <b>Stratified by maternal Pb</b> |                    |     |                   |       |      |       |             |      |           |       |
| <2                               | <2                 | 281 | 0.65±1.30         | Ref   |      |       | 111(39.5)   | 1.00 |           |       |
| <2                               | ≥2                 | 159 | 0.47±1.18         | -0.00 | 0.12 | 0.969 | 54(34.0)    | 1.00 | 0.64-1.56 | 0.990 |
| ≥2                               | <2                 | 398 | 0.81±1.17         | Ref   |      |       | 184(46.2)   | 1.00 |           |       |
| ≥2                               | ≥2                 | 433 | 0.83±1.17         | 0.05  | 0.08 | 0.502 | 191(44.1)   | 0.94 | 0.70-1.25 | 0.655 |
| <b>Stratified by child Pb</b>    |                    |     |                   |       |      |       |             |      |           |       |
| <2                               | <2                 | 281 | 0.65±1.30         | Ref   |      |       | 111(39.5)   | 1.00 |           |       |
| <2                               | ≥2                 | 398 | 0.81±1.17         | 0.13  | 0.09 | 0.180 | 184(46.2)   | 1.34 | 0.95-1.88 | 0.091 |
| ≥2                               | <2                 | 159 | 0.47±1.18         | Ref   |      |       | 54(34.0)    | 1.00 |           |       |
| ≥2                               | ≥2                 | 433 | 0.83±1.17         | 0.30  | 0.11 | 0.004 | 191(44.1)   | 1.48 | 0.98-2.23 | 0.064 |
| <b>Combined</b>                  |                    |     |                   |       |      |       |             |      |           |       |
| <2                               | <2                 | 281 | 0.65±1.30         | ref   |      |       | 111(39.5)   | 1.00 |           |       |
| <2                               | ≥2                 | 159 | 0.47±1.18         | -0.05 | 0.11 | 0.673 | 54(34.0)    | 0.93 | 0.61-1.42 | 0.721 |
| ≥2                               | <2                 | 398 | 0.81±1.17         | 0.15  | 0.09 | 0.093 | 184(46.2)   | 1.36 | 0.98-1.90 | 0.065 |
| ≥2                               | ≥2                 | 433 | 0.83±1.17         | 0.21  | 0.09 | 0.022 | 191(44.1)   | 1.29 | 0.93-1.80 | 0.126 |

Abbreviation: BMI, body mass index; OWO, overweight or obesity.

Analyses were performed by linear and logistic regression models for outcome BMI z-scores and OWO, respectively.

Adjusted for maternal education, parity, smoking, race, pre-pregnancy overweight or obesity, diabetes, hypertensive disorders, preterm, fetal growth, breastfeeding.

**eTable 12.** The individual and combined associations of maternal RBC lead and child blood lead levels on child leptin and insulin z-scores.

| Maternal Lead (µg/dl) | Child Lead (µg/dl) | n   | Ln leptin |       |      |        | Ln insulin |           |       |      |       |
|-----------------------|--------------------|-----|-----------|-------|------|--------|------------|-----------|-------|------|-------|
|                       |                    |     | mean±SD   | β     | se   | p      | mean±SD    | β         | se    | p    |       |
|                       | <2                 | 378 | 0.67±0.99 | ref   |      |        | 238        | 2.48±0.78 | ref   |      |       |
|                       | 2-4                | 338 | 0.59±1.04 | -0.03 | 0.08 | 0.687  | 264        | 2.42±0.87 | -0.05 | 0.07 | 0.501 |
|                       | ≥5                 | 44  | 0.66±1.12 | 0.11  | 0.16 | 0.505  | 28         | 2.40±0.70 | -0.02 | 0.16 | 0.896 |
| <2                    |                    | 252 | 0.48±0.98 | ref   |      |        | 164        | 2.36±0.80 | ref   |      |       |
| 2-4                   |                    | 424 | 0.62±1.02 | 0.15  | 0.08 | 0.071  | 299        | 2.44±0.79 | 0.08  | 0.08 | 0.315 |
| ≥5                    |                    | 146 | 0.83±1.06 | 0.37  | 0.11 | <0.001 | 109        | 2.65±0.87 | 0.28  | 0.10 | 0.007 |
| <b>Combined</b>       |                    |     |           |       |      |        |            |           |       |      |       |
| <2                    | <2                 | 136 | 0.58±0.93 | ref   |      |        | 81         | 2.39±0.84 | ref   |      |       |
|                       | 2-4                | 84  | 0.43±1.02 | -0.13 | 0.14 | 0.348  | 62         | 2.29±0.76 | -0.14 | 0.13 | 0.300 |
|                       | ≥5                 | 10  | 0.23±1.28 | -0.38 | 0.33 | 0.243  | 7          | 2.12±0.69 | -0.41 | 0.31 | 0.192 |
| 2-4                   | <2                 | 194 | 0.69±1.00 | 0.10  | 0.11 | 0.358  | 125        | 2.49±0.72 | 0.03  | 0.11 | 0.804 |
|                       | 2-4                | 177 | 0.58±1.06 | 0.05  | 0.11 | 0.689  | 139        | 2.39±0.88 | -0.03 | 0.11 | 0.768 |
|                       | ≥5                 | 21  | 0.52±0.77 | 0.10  | 0.24 | 0.667  | 13         | 2.45±0.74 | 0.19  | 0.24 | 0.420 |
| ≥5                    | <2                 | 48  | 0.81±1.12 | 0.22  | 0.17 | 0.197  | 32         | 2.69±0.83 | 0.19  | 0.17 | 0.252 |
|                       | 2-4                | 77  | 0.79±1.00 | 0.26  | 0.15 | 0.071  | 63         | 2.62±0.94 | 0.19  | 0.14 | 0.163 |
|                       | ≥5                 | 13  | 1.21±1.32 | 0.80  | 0.29 | 0.007  | 8          | 2.56±0.66 | 0.15  | 0.30 | 0.607 |

Analyses were performed by linear regression models.

Adjusted for maternal education, parity, smoking, race, pre-pregnancy overweight or obesity, diabetes, hypertensive disorders, preterm, fetal growth, breastfeeding, child's age and sex, and maternal lead in red blood cells.

Leptin and insulin were log-transformed.

**eTable 13.** Maternal plasma folate levels according to prenatal vitamin intake during 3 trimesters.

| Trimester | Plasma folate (nmol/L) |                 |                 | P value |
|-----------|------------------------|-----------------|-----------------|---------|
|           | ≤2 times/wk            | 3-5 times/wk    | Almost daily    |         |
| First     | 30.2(20.1-45.3)        | 33.2(23.5-45.2) | 32.5(22.5-44.4) | 0.322   |
| Second    | 25.3(16.4-43.3)        | 33.7(24.0-46.0) | 32.5(23.2-44.5) | <0.001  |
| Third     | 25.4(16.2-46.6)        | 34.0(24.7-45.6) | 32.6(23.3-45.2) | <0.001  |

**eTable 14.** Role of maternal folic acid intake during 2nd trimester in the associations of maternal RBC-lead levels and child BMI z-score and overweight or obesity (OWO) risk (age range: 2-15 years), stratified by maternal OWO status.

| Maternal status                |                              | Offspring BMI z-score |           |       |      |       | Offspring OWO |      |           |       |
|--------------------------------|------------------------------|-----------------------|-----------|-------|------|-------|---------------|------|-----------|-------|
| Lead (µg/dl)                   | Folic acid Intake (times/wk) | n                     | mean±SD   | β     | se   | p     | Case, n(%)    | OR   | 95%CI     | p     |
| <b>Non-OWO mothers (n=636)</b> |                              |                       |           |       |      |       |               |      |           |       |
| <2                             | ≤ 2                          | 24                    | 0.33±1.10 | ref   |      |       | 5(20.8)       | 1.00 |           |       |
| <2                             | ≥3                           | 220                   | 0.16±1.16 | 0.02  | 0.24 | 0.949 | 53(24.1)      | 1.59 | 0.51-4.94 | 0.424 |
| ≥2                             | ≤ 2                          | 28                    | 0.21±1.52 | ref   |      |       | 7(25.0)       | 1.00 |           |       |
| ≥2                             | ≥3                           | 364                   | 0.57±1.16 | 0.38  | 0.23 | 0.097 | 132(36.3)     | 1.74 | 0.71-4.29 | 0.227 |
| <b>OWO mothers (n=699)</b>     |                              |                       |           |       |      |       |               |      |           |       |
| <2                             | ≤ 2                          | 28                    | 1.08±1.04 | ref   |      |       | 16(57.1)      | 1.00 |           |       |
| <2                             | ≥3                           | 209                   | 0.93±1.24 | -0.21 | 0.23 | 0.368 | 101(48.3)     | 0.71 | 0.30-1.70 | 0.445 |
| ≥2                             | ≤ 2                          | 33                    | 1.46±0.96 | ref   |      |       | 24(72.7)      | 1.00 |           |       |
| ≥2                             | ≥3                           | 429                   | 1.01±1.12 | -0.50 | 0.20 | 0.011 | 224(52.2)     | 0.38 | 0.17-0.84 | 0.017 |

Abbreviation: BMI, body mass index; OWO, overweight or obesity.

Analyses were performed by linear and logistic regression models for outcome BMI z-scores and OWO, respectively.

Analyses were restricted in folic acid intake during 2<sup>nd</sup> trimester available samples (n=1335). BMI, body mass index; Adjusted for maternal education, parity, smoking, race, diabetes, hypertensive disorders, preterm, fetal growth, breastfeeding, and child blood lead.

**eTable 15.** Role of maternal folic acid intake during 3rd trimester in the associations of maternal RBC-lead levels and child BMI z-score and overweight or obesity (OWO) risk (age range: 2-15 years), stratified by maternal OWO status.

| Maternal status                |                              |     | Offspring BMI z-score |       |      |       | Offspring OWO |      |           |       |
|--------------------------------|------------------------------|-----|-----------------------|-------|------|-------|---------------|------|-----------|-------|
| Lead (µg/dl)                   | Folic acid Intake (times/wk) | n   | mean±SD               | β     | se   | p     | Case, n(%)    | OR   | 95%CI     | p     |
| <b>Non-OWO mothers (n=634)</b> |                              |     |                       |       |      |       |               |      |           |       |
| <2                             | ≤2                           | 34  | 0.29±1.13             | ref   |      |       | 8(23.5)       | 1.00 |           |       |
| <2                             | ≥3                           | 209 | 0.16±1.17             | -0.01 | 0.21 | 0.949 | 50(23.9)      | 1.21 | 0.48-3.03 | 0.684 |
| ≥2                             | ≤2                           | 26  | 0.52±1.51             | ref   |      |       | 9(34.6)       | 1.00 |           |       |
| ≥2                             | ≥3                           | 365 | 0.54±1.17             | 0.03  | 0.24 | 0.891 | 129(35.3)     | 1.00 | 0.42-2.35 | 0.995 |
| <b>OWO mothers (n=692)</b>     |                              |     |                       |       |      |       |               |      |           |       |
| <2                             | ≤2                           | 37  | 1.02±1.10             | ref   |      |       | 21(56.8)      | 1.00 |           |       |
| <2                             | ≥3                           | 196 | 0.92±1.23             | -0.22 | 0.21 | 0.300 | 94(48.0)      | 0.63 | 0.29-1.38 | 0.251 |
| ≥2                             | ≤2                           | 41  | 1.28±1.05             | ref   |      |       | 25(61.0)      | 1.00 |           |       |
| ≥2                             | ≥3                           | 418 | 1.02±1.12             | -0.34 | 0.18 | 0.055 | 22(52.9)      | 0.63 | 0.32-1.23 | 0.175 |

Abbreviation: BMI, body mass index; OWO, overweight or obesity.

Analyses were performed by linear and logistic regression models for outcome BMI z-scores and OWO, respectively.

Analyses were restricted in folic acid intake during 3<sup>rd</sup> trimester available samples (n=1326). BMI, body mass index; Adjusted for maternal education, parity, smoking, race, diabetes, hypertensive disorders, preterm, fetal growth, breastfeeding, and child blood lead.
